# Supplementary material for: Monolith dip-it: a bifunctional device for improving the sensitivity of direct analysis in real time mass spectrometry
Source: Royal Society of Chemistry journal article supplement (doi:10.1039/c6an00839a), 2016-01-01
Supplement: c6an00839a1.pdf [file c6an00839a1.pdf]

## Supporting Information

### Monolith dip-it: a bifunctional device for improving the sensitivity of direct analysis in real time mass spectrometry

Xianjiang Li<sup>†</sup>, Ze Li<sup>†</sup>, Xin Wang<sup>†</sup>, Honggang Nie<sup>‡</sup>, Yiding Zhang<sup>†</sup>, Yu Bai<sup>†, \*</sup>, Huwei Liu<sup>†, \*</sup>

<sup>†</sup>Beijing National Laboratory for Molecular Sciences, Key Laboratory of Bioorganic Chemistry and Molecular Engineering of Ministry of Education, Institute of Analytical Chemistry, College of Chemistry and Molecular Engineering, Peking University, Beijing, 100871, P. R. China

<sup>‡</sup>Analytical Instrumentation Center, Peking University, Beijing, 100871, P. R. China

Table SI Results comparison before and after monolith dip-it extraction in positive mode

| Name                                | Formula                                                         | [M+H] <sup>+</sup> | C (µg/mL) | T (°C) | S/N(before) | S/N(after) |
|-------------------------------------|-----------------------------------------------------------------|--------------------|-----------|--------|-------------|------------|
| Sudan I                             | C <sub>16</sub> H <sub>12</sub> N <sub>2</sub> O                | 249.102            | 0.1       | 350    | <1          | 61.9       |
| Sudan II                            | C <sub>18</sub> H <sub>16</sub> N <sub>2</sub> O                | 277.1335           | 0.1       | 350    | <1          | 31.0       |
| Sudan III                           | C <sub>22</sub> H <sub>16</sub> N <sub>4</sub> O                | 353.1397           | 0.1       | 350    | <1          | 25.1       |
| Sudan IV                            | C <sub>24</sub> H <sub>20</sub> N <sub>4</sub> O                | 381.171            | 0.1       | 350    | <1          | 21.9       |
| Sudan Red 7B                        | C <sub>24</sub> H <sub>21</sub> N <sub>5</sub>                  | 380.187            | 0.1       | 400    | <1          | 18         |
| Rhodamine B                         | C <sub>28</sub> H <sub>31</sub> ClN <sub>2</sub> O <sub>3</sub> | 443.2335           | 1         | 400    | <1          | 65.9       |
| 6,9-Dichloro-2-methoxyacridine      | C <sub>14</sub> H <sub>9</sub> Cl <sub>2</sub> NO               | 278.01             | 1         | 400    | 25.9        | 76.2       |
| Acridine                            | C <sub>13</sub> H <sub>9</sub> N                                | 180.0808           | 1         | 400    | 52.5        | 594.4      |
| 2-Aminoanthraquinone                | C <sub>14</sub> H <sub>9</sub> NO <sub>2</sub>                  | 224.0706           | 1         | 400    | <1          | 4.9        |
| 4-Amino-3,5-dimethyl-1,2,4-triazole | C <sub>4</sub> H <sub>8</sub> N <sub>4</sub>                    | 113.0822           | 1         | 350    | 1.3         | 413.3      |
| minoacrinine                        | C <sub>13</sub> H <sub>10</sub> N <sub>2</sub>                  | 195.0917           | 1         | 400    | <1          | 291.3      |
| Simazine                            | C <sub>7</sub> H <sub>12</sub> ClN <sub>5</sub>                 | 202.0854           | 0.1       | 400    | <1          | 13.6       |
| Propazine                           | C <sub>9</sub> H <sub>16</sub> ClN <sub>5</sub>                 | 230.1167           | 0.1       | 350    | <1          | 31.3       |
| Prometon                            | C <sub>10</sub> H <sub>19</sub> N <sub>5</sub> O                | 226.1662           | 0.1       | 400    | 1.5         | 40.9       |
| Gesatamine                          | C <sub>9</sub> H <sub>17</sub> N <sub>5</sub> O                 | 212.1506           | 0.1       | 400    | 3.2         | 50.5       |
| Melamine                            | C <sub>3</sub> H <sub>6</sub> N <sub>6</sub>                    | 127.0727           | 1         | 400    | 9.7         | 254        |
| Dodecanamine                        | C <sub>12</sub> H <sub>27</sub> N                               | 186.2216           | 1         | 350    | 1.5         | 269.1      |
| Quinine                             | C <sub>20</sub> H <sub>24</sub> N <sub>2</sub> O <sub>2</sub>   | 325.1919           | 1         | 350    | <1          | 12.3       |
| Sulfadoxine                         | C <sub>12</sub> H <sub>14</sub> N <sub>4</sub> O <sub>4</sub> S | 311.0809           | 1         | 400    | <1          | 168.3      |
| Amitriptyline                       | C <sub>20</sub> H <sub>23</sub> N                               | 278.1903           | 1         | 350    | <1          | 50.7       |
| Methyltestosterone                  | C <sub>20</sub> H <sub>30</sub> O <sub>2</sub>                  | 303.2319           | 1         | 350    | <1          | 28.8       |
| Sulfadiazine                        | C <sub>10</sub> H <sub>10</sub> N <sub>4</sub> O <sub>2</sub> S | 251.0597           | 1         | 350    | <1          | 15.2       |
| Guanosine                           | C <sub>10</sub> H <sub>13</sub> N <sub>5</sub> O <sub>5</sub>   | 284.0989           | 1         | 350    | <1          | 12.2       |
| Sulfamerazine                       | C <sub>11</sub> H <sub>12</sub> N <sub>4</sub> O <sub>2</sub> S | 265.0754           | 1         | 400    | <1          | 72.6       |
| Uridine                             | C <sub>9</sub> H <sub>12</sub> N <sub>2</sub> O <sub>6</sub>    | 245.0768           | 1         | 350    | 1.9         | 2.7        |

Table S2 Results comparison before and after monolith dip-it extraction in negative mode

| Name                       | Formula                                                       | [M-H] <sup>-</sup> | C (μg/mL) | T (°C) | S/N(before) | S/N(after) |
|----------------------------|---------------------------------------------------------------|--------------------|-----------|--------|-------------|------------|
| p-Chlorobenzoic acid       | C <sub>7</sub> H <sub>5</sub> ClO <sub>2</sub>                | 155.5592           | 1         | 350    | 7.1         | 76.1       |
| Erucic acid                | C <sub>22</sub> H <sub>42</sub> O <sub>2</sub>                | 338.3185           | 1         | 350    | <1          | 5.4        |
| 2, 5-Dihydroxybenzoic acid | C <sub>7</sub> H <sub>6</sub> O <sub>4</sub>                  | 154.0266           | 1         | 400    | 3.4         | 14.1       |
| Nalidixic acid             | C <sub>12</sub> H <sub>12</sub> N <sub>2</sub> O <sub>3</sub> | 232.0848           | 1         | 350    | 1.9         | 43.9       |
| Cholic acid                | C <sub>24</sub> H <sub>40</sub> O <sub>5</sub>                | 408.2876           | 1         | 350    | <1          | 6.4        |
| Arachidic acid             | C <sub>20</sub> H <sub>40</sub> O <sub>2</sub>                | 312.3028           | 1         | 350    | <1          | 4.5        |
| m-Hydroxybenzoic acid      | C <sub>7</sub> H <sub>6</sub> O <sub>3</sub>                  | 138.0317           | 1         | 350    | <1          | 11.1       |
| α-Naphthoic acid           | C <sub>11</sub> H <sub>8</sub> O <sub>2</sub>                 | 172.0524           | 1         | 350    | 2.9         | 34.3       |
| Aurintricarboxylic Acid    | C <sub>22</sub> H <sub>14</sub> O <sub>9</sub>                | 422.0638           | 1         | 350    | <1          | 25.1       |
| Carbazole                  | C <sub>12</sub> H <sub>9</sub> N                              | 167.0735           | 1         | 350    | 1.5         | 24.5       |
| Tetradecanoic acid         | C <sub>14</sub> H <sub>28</sub> O <sub>2</sub>                | 228.2089           | 1         | 350    | 1           | 96.2       |
| 3-Indolebutyric acid       | C <sub>12</sub> H <sub>13</sub> NO <sub>2</sub>               | 203.0946           | 1         | 350    | <1          | 14.8       |
| Vanillic acid              | C <sub>8</sub> H <sub>8</sub> O <sub>4</sub>                  | 168.0423           | 1         | 350    | 2.1         | 33.5       |
| N-Phenylanthranilic acid   | C <sub>13</sub> H <sub>11</sub> NO <sub>2</sub>               | 213.079            | 1         | 350    | 2.1         | 10.1       |
| 5-Sulfosalicylic acid      | C <sub>7</sub> H <sub>10</sub> O <sub>8</sub> S               | 254.0096           | 1         | 350    | <1          | 32.9       |

Table S3 Comparison of the mass spectrometry based methods used for determination of Sudan dyes

| Analyte     | Real samples                 | Sample preparation                      | Detection          | LODs                 | Precision<br>(%RSD<br>) | Ref.         |
|-------------|------------------------------|-----------------------------------------|--------------------|----------------------|-------------------------|--------------|
| Sudan I     | Chili foods                  | Ethanol extraction                      | LC-APCI-MS         | 3000 ng/g            | < 3                     | 1            |
| Sudan I ~IV | Chili and curry food         | DMSO extraction                         | LC-ESI-MS          | 1.5~5.5<br>ng/mL     | < 8.2                   | 2            |
| Sudan I ~IV | Paprika paste                | Acetone extraction                      | GC-MS              | 0.3~7.7<br>ng/g      | 10.2~16                 | 3            |
| Sudan I ~IV | Chili products               | Silica solid-phase<br>extraction        | ESI-MS             | 1.1~4.3<br>ng/g      | < 8.6                   | 4            |
| Sudan I ~IV | Chili products               | Acetone extraction                      | LC-ESI-MS          | 3~11 ng/g            | 1~13                    | 5            |
| Sudan I ~IV | Chili powders                | Acetonitrile extraction                 | LC-ESI-MS          | 5-50 ng/g            | 1.7~13.6                | 6            |
| Sudan I ~IV | Spices powders.              | Acetone extraction                      | TLC-MS             | 108.9~98<br>0.4 ng/g | 1.48~2.50               | 7            |
| Sudan I ~IV | Food samples                 | QuEChERS extraction                     | LC-ESI-MS          | 1.50~4.04<br>ng/g    | 1.42~5.30               | 8            |
| Sudan I ~IV | Cosmetics and<br>foodstuffs  | No                                      | Paper spray-<br>MS | 5~20 ng/g            | No                      | 9            |
| Sudan I ~IV | Chili powder<br>tomato sauce | Hexane extraction                       | LC-APPI-MS         | 5~18<br>ng/mL        | < 8                     | 10           |
| Sudan I ~IV | Chili powder                 | Hexane extraction                       | DART-MS            | 80~100<br>ng/mL      | 6~25                    | 11           |
| Sudan I ~IV | Chili oil and powder         | Carbon nanotube film<br>microextraction | DCBI-MS            | 1.4~21<br>ng/g       | 9.9~19.2                | 12           |
| Sudan I ~IV | Chili powder                 | Hexane extraction                       | DART-MS            | 5~10<br>ng/mL        | 8.5~13.8                | This<br>work |

### Notes and references

1. F. Tateo and M. Bononi, *J. Agric. Food Chem.*, 2004, **52**, 655-658.
2. M. Ma, X. B. Luo, B. Chen, S. P. Sub and S. Z. Yao, *J. Chromatogr. A*, 2006, **1103**, 170-176.
3. U. S. Erdemir, B. Izgi and S. Gucer, *Anal. Methods*, 2013, **5**, 1790-1798.
4. M.-M. Zheng, J.-H. Wu, Y.-Q. Feng and F.-H. Huang, *Anal. Methods*, 2011, **3**, 1851-1858.
5. F. Calbiani, M. Careri, L. Elviri, A. Mangia, L. Pistarà and I. Zagnoni, *J. Chromatogr. A*, 2004, **1042**, 123-130.
6. C.-F. Tsai, C.-H. Kuo and D. Y.-C. Shih, *J. Food Drug Anal.*, 2015, **23**, 453-462.

7. R. Rani, S. Medhe and M. Srivastava, *J. Food Meas. Charact.*, 2015, **9**, 186-194.
8. M. M. A. Omar, A. A. Elbashir and O. J. Schmitz, *Food Chem.*, 2015, **176**, 342-349.
9. Q. Ma, H. Bai, W. Li, C. Wang, X. Li, R. G. Cooks and Z. Ouyang, *Anal. Chim. Acta*, 2016, **912**, 65-73.
10. M. R. V. S. Murty, N. Sridhara Chary, S. Prabhakar, N. Prasada Raju and M. Vairamani, *Food Chem.*, 2009, **115**, 1556-1562.
11. Z. Li, Y.-W. Zhang, Y.-D. Zhang, Y. Bai and H.-W. Liu, *Anal. Methods*, 2015, **7**, 86-90.
12. D. Chen, Y.-Q. Huang, X.-M. He, Z.-G. Shi and Y.-Q. Feng, *Analyst*, 2015, **140**, 1731-1738.
